# Supplementary material for: Engineering g-C 3 N 5 /MnCo 2 S 4 heterojunction nanocomposites for highly efficient visible-light photocatalytic dye degradation and electrochemical energy conversion
Source: Royal Society of Chemistry journal article supplement (doi:10.1039/d5nr05118e), 2026-01-01

## Supporting Information

### Engineering g-C<sub>3</sub>N<sub>5</sub>/MnCo<sub>2</sub>S<sub>4</sub> Heterojunction Nanocomposites for Highly Efficient Visible-Light Photocatalytic Dye Degradation and Electrochemical Energy Conversion

Sathiya Balashanmuga Nehru<sup>a#</sup>, Kasimayan Uma<sup>b#</sup>, Nagapandiselvi Perumal<sup>a</sup>, Yazhini Priya Subbarayalu<sup>a</sup>, Chao-Ming Huang<sup>c</sup>, Mangalaraja Ramalinga Viswanathan<sup>d</sup>, Lung-Chien Chen<sup>\*e</sup>, Zong-Liang Tseng<sup>\*b</sup>

<sup>a</sup>Department of Physics, Sri Sivasubramaniya Nadar College of Engineering, Kalavakkam, Chennai, 603110, Tamil Nadu, India.

<sup>b</sup>Department of Electronics, Ming Chi University of Technology, New Taipei City, Taiwan

<sup>c</sup>Department of Materials Engineering, Kun Shan University, 195 Kunda Rd., Yongkang Dist., Tainan City, 710, Taiwan, ROC

<sup>d</sup>Faculty of Engineering and Architecture, Universidad Arturo Prat, Avenida Arturo Prat 2120, Iquique 1110939, Chile.

<sup>e</sup>Department of Electro-Optical Engineering, National Taipei University of Technology, Taipei, Taiwan

<sup>#</sup> Equal Contribution

#### S1. Instrumentation

A powder X-ray diffractometer was employed to investigate the crystallinity and phase composition of the synthesized materials (P-XRD) (ARL EQUINOX300, Cu-K $\alpha$ , 1.5406 Å), while Fourier transform infrared (FT-IR) spectroscopy (Jasco FT/IR-4600, KBr pellet method) identified the functional groups. Raman spectroscopy (Renishaw, UK, Model no: 2CCN98) was used to perform the Raman analysis. The morphology and elemental composition were characterized by field emission scanning electron microscope (FE-SEM) (JEOL-JSM-7610F) and high-resolution transmission electron microscope (HR-TEM) (JEOL-JEM-2100 Plus) with energy-dispersive X-ray spectroscope (EDS). The X-ray photoelectron spectrometer (XPS) (K-Alpha-PHI 5000 Versaprobe III) was used to determine chemical states, and optical properties were analysed using UV-visible diffuse reflectance spectrometer (UV-Vis DRS) (Shimadzu UV-2600) and a single-beam UV-vis spectrophotometer (LMSPUV1900). The average surface area, pore size and volume were found using Brunauer-Emmett-

Teller (BET) (Autosorb iQ Station 1) instrument. The electrochemical experiments were conducted using a Bio-logic SAS (model number: SP-50e/150e) electrochemical instrument.

**Figure S1.** Raman spectrum of GCN/MCS composite.

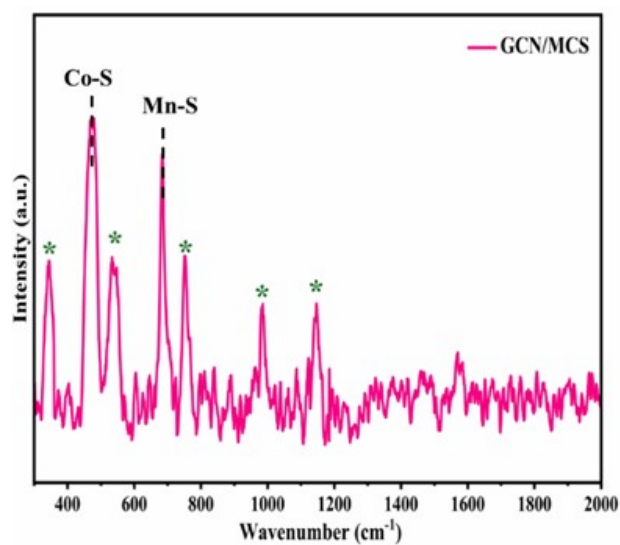

**Table ST1.** Surface area, average pore volume and pore diameter calculated from N<sub>2</sub> adsorption /desorption isotherm.

| Materials | Surface area<br>(m <sup>2</sup> g <sup>-1</sup> ) | Average Pore<br>volume (cm <sup>3</sup> g <sup>-1</sup> ) | Average Pore<br>diameter (nm) |
|-----------|---------------------------------------------------|-----------------------------------------------------------|-------------------------------|
| GCN       | 7.72                                              | 0.067                                                     | 36.5                          |
| MCS       | 9.00                                              | 0.035                                                     | 15.78                         |
| GCN/MCS   | 21.88                                             | 0.107                                                     | 19.66                         |

**Figure S2.** VB-XPS spectra of a) GCN and b) MCS.

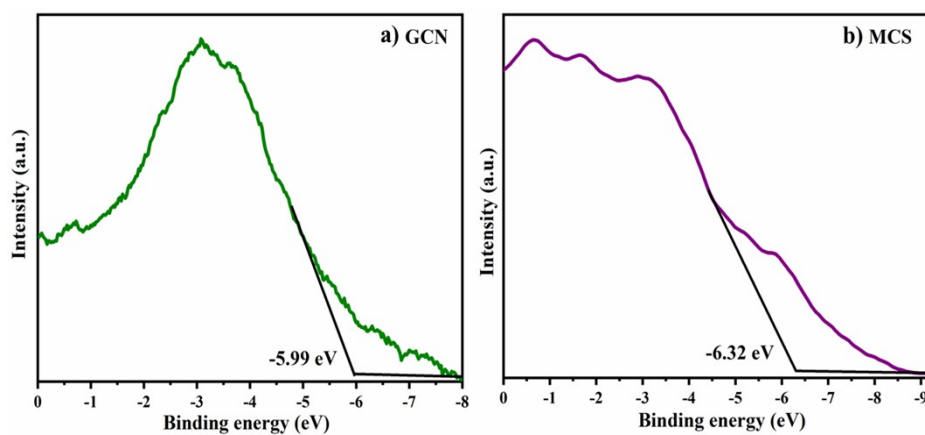

**Figure S3.** ESCA (a-c) and Cdl (d-f) plots for HER.

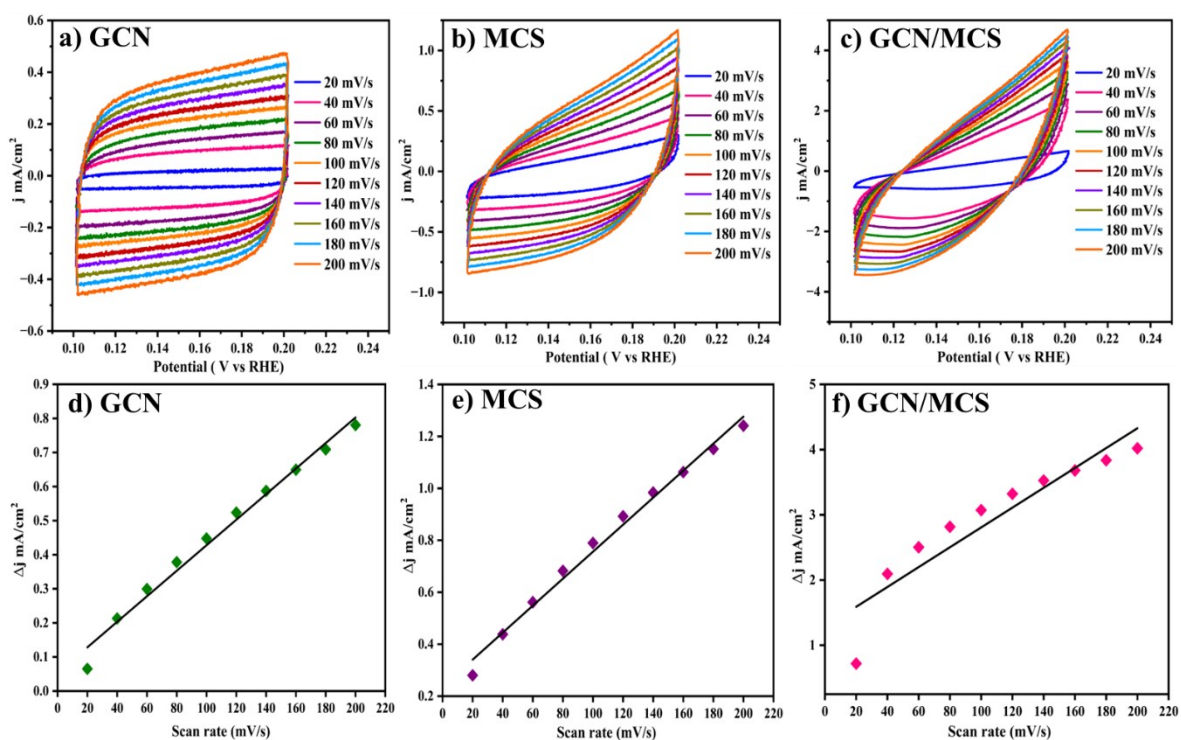

**Figure S4.** ESCA (a-c) and Cdl (d-f) plots for OER.

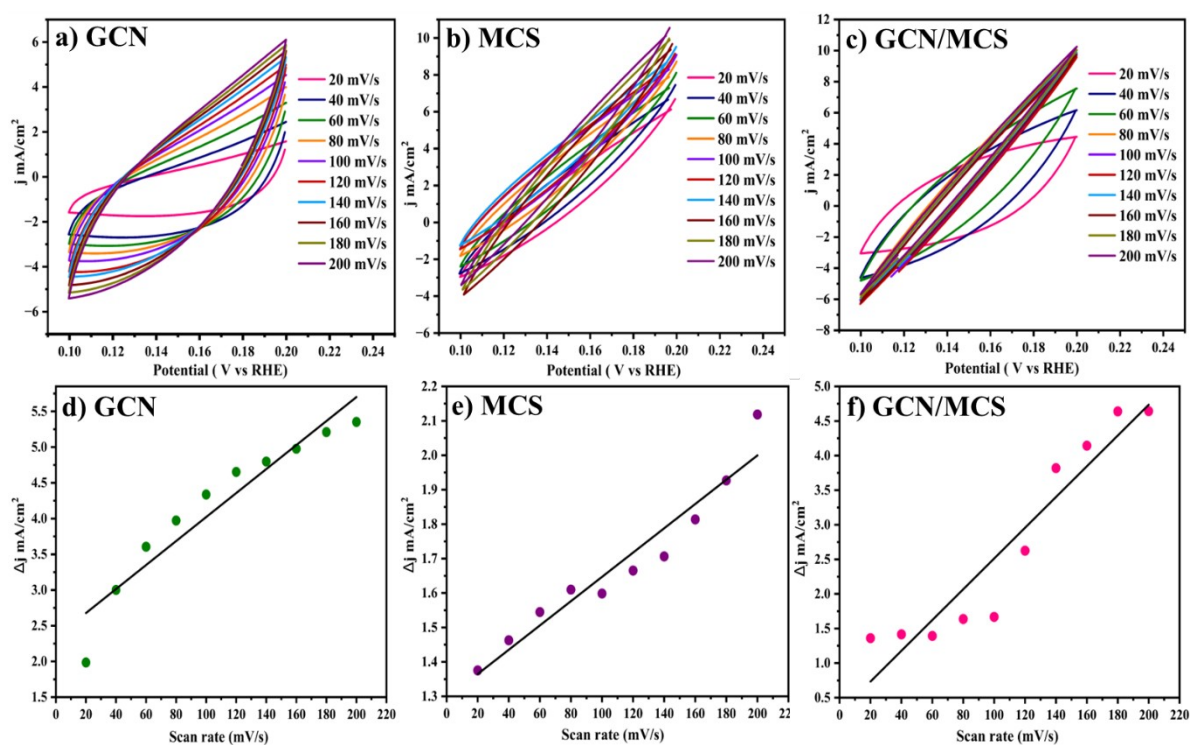

**Figure S5.** a) XRD and FE-SEM analyses (b & c) of the prepared nanocomposite before and after the electrocatalytic activity.

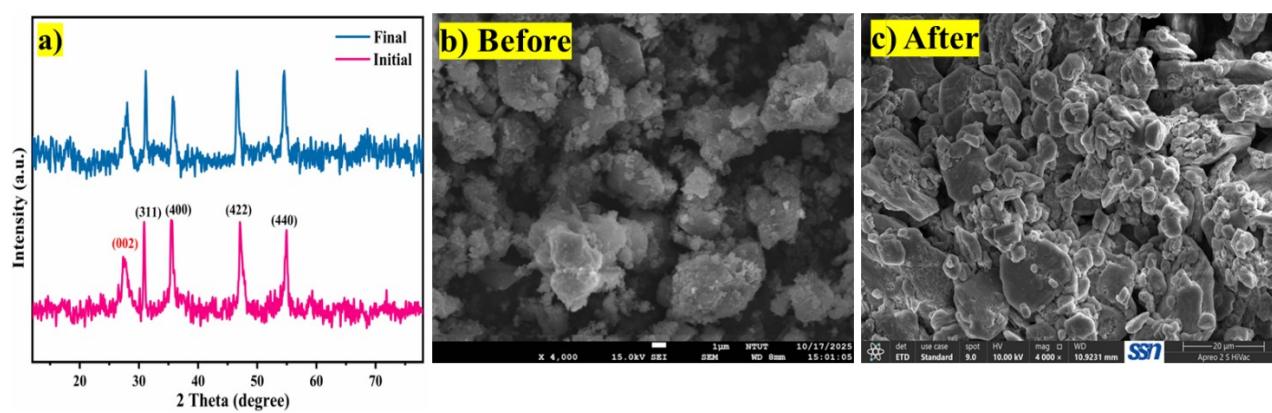

Supplement: d5nr05118e1.pdf [file d5nr05118e1.pdf]
